# Supplementary material for: Effect of ocean acidification on the structure and fatty acid composition of a natural plankton community in the Baltic Sea
Source: Copernicus journal article supplement (doi:10.5194/bg-2015-669), 2016-01-18
Supplement: Supplementary file 1 [file bg-2015-669-supplement.pdf]

## SUPPLEMENTARY INFORMATION

### **Effect of ocean acidification on the structure and fatty acid composition of a natural plankton community in the Baltic Sea**

J.R. Bermúdez<sup>1,2</sup>, M. Winder<sup>3</sup>, A. Stühr<sup>1</sup>, A.K. Almén<sup>4,5,6</sup>, J. E. Öst<sup>4,5</sup>, U. Riebesell<sup>1</sup>

[1] GEOMAR Helmholtz Centre for Ocean Research Kiel, Germany.

[2] {Facultad de Ingeniería Marítima, Ciencias Biológicas, Oceánicas y Recursos Naturales. Escuela Superior Politécnica del Litoral, ESPOL, Guayaquil, Ecuador}

[3] {Department of Ecology, Environment and Plant Sciences, Stockholm University, Stockholm, Sweden}

[4] {Environmental and Marine Biology, Faculty of Science and Engineering, Åbo Akademi University, Åbo, Finland}

[5] {Aronia Research and Development Institute, Novia University of Applied Sciences and Åbo Akademi University, Ekenäs Finland}

[6] {Tvärminne Zoological Station, University of Helsinki, J.A. Palménin tie 260, FI-10900 Hanko, Finland}

Correspondence to: J.R. Bermúdez (jrbermud@espol.edu.ec)

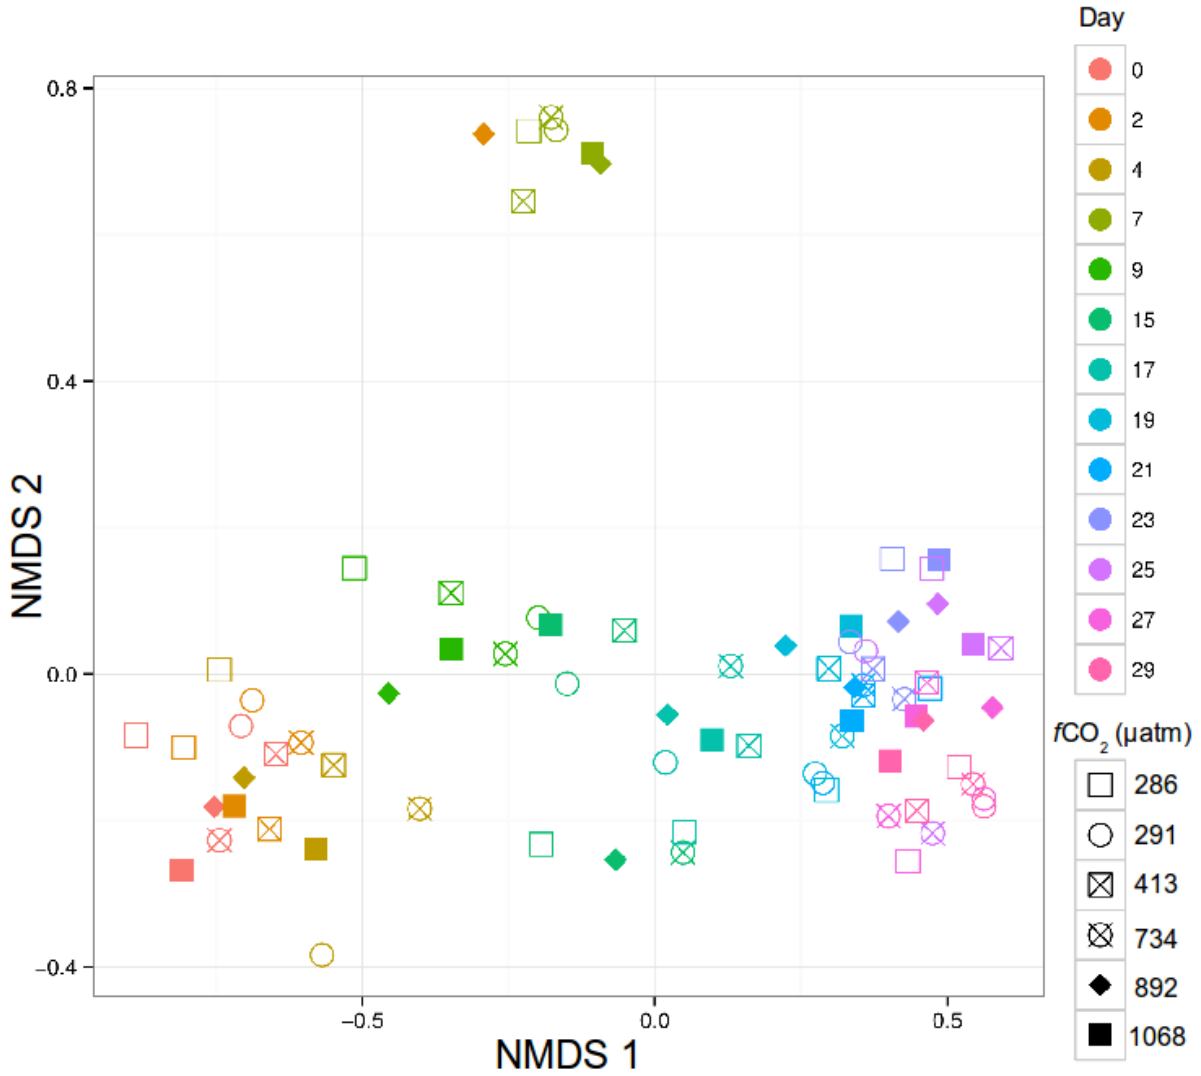

**Figure S1.** Non Metrical Multidimensional Scaling (NMDS) of the plankton community composition in terms of calculated biomass change through sampling days and CO<sub>2</sub> treatment. The NMDS 1 axis show that the phytoplankton communities diverge through time while the NMDS 2 axis show that the communities do not differ with CO<sub>2</sub> treatment levels.

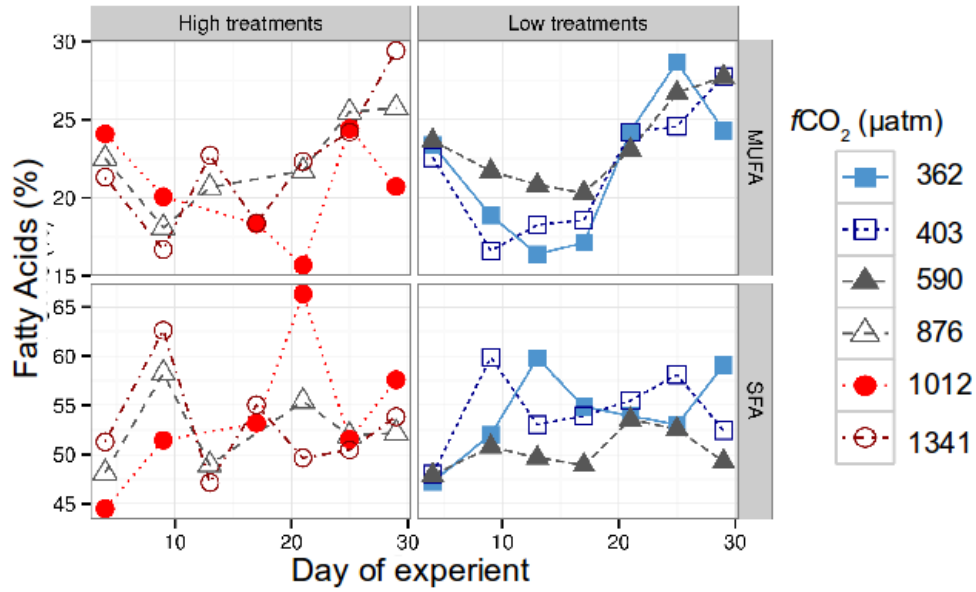

**Figure S2.** Relative seston MUFA and SFA content over experimental duration across the CO<sub>2</sub> treatments. The MUFA and SFA of all CO<sub>2</sub> treatments showed an increase, although the relation of both with time is weak (Linear regression,  $R^2 = 0.12$ ,  $t = 2.88$ ,  $p = 0.005$  and  $R^2 = 0.15$ ,  $t = 3.26$ ,  $p = 0.001$  respectively).

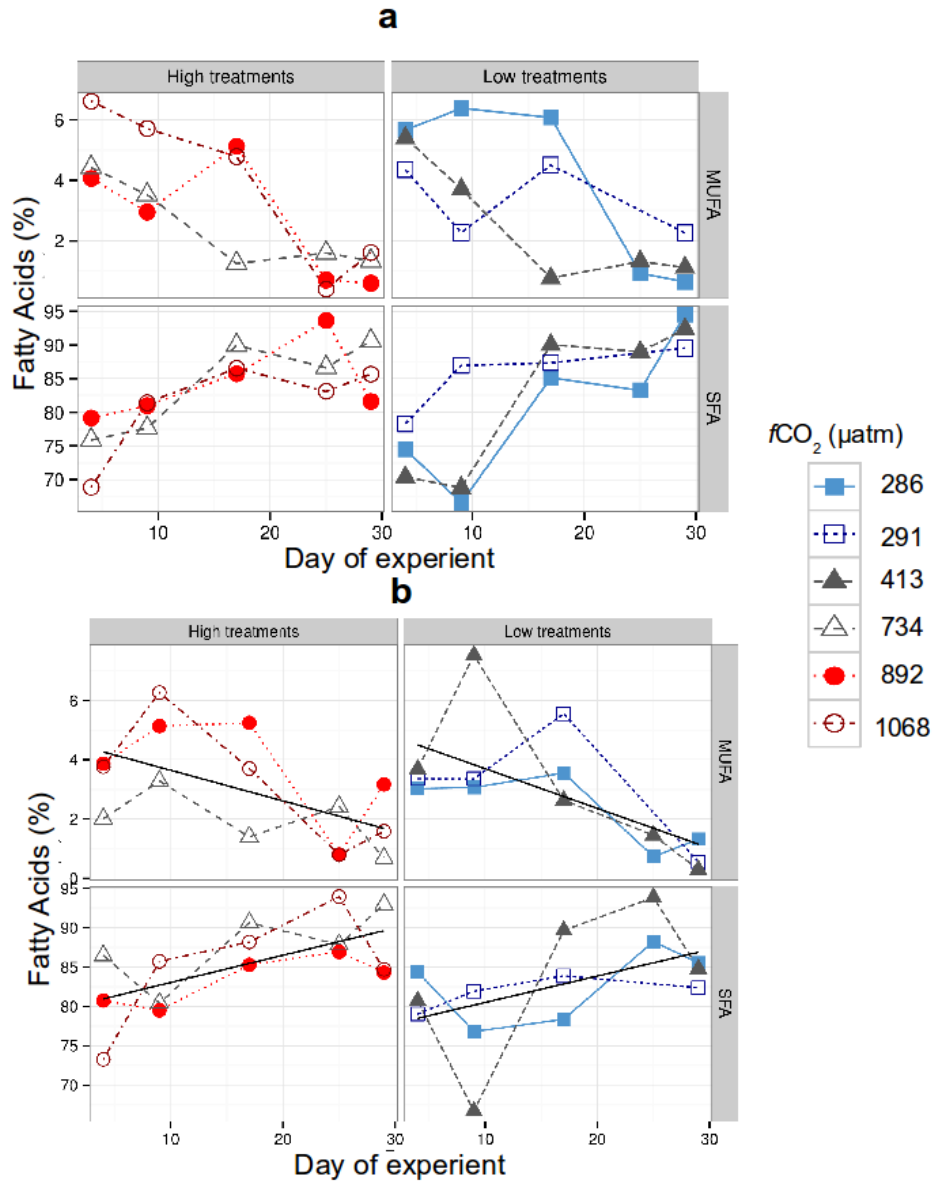

**Figure S3.** Relative MUFA and SFA content of the copepod (a) *Acartia bifilosa* and (b) *Eurytemora affinis* across the CO<sub>2</sub> treatments. The MUFA and SFA of all CO<sub>2</sub> treatments showed a significant increase over time.

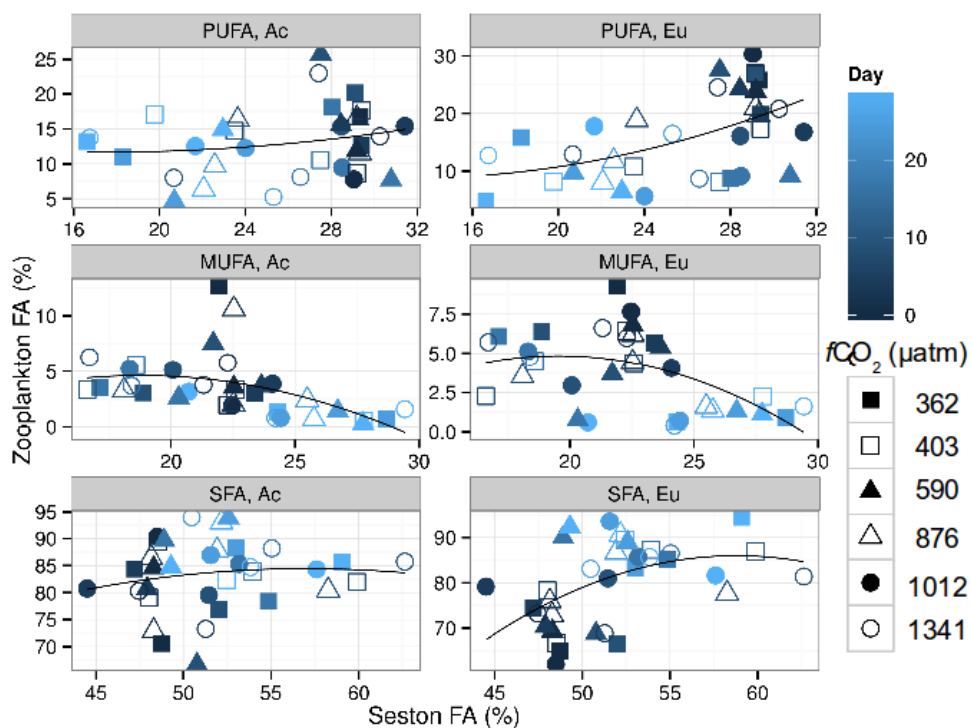

**Figure S4.** Relative PUFA, MUFA and SFA content of the copepods *Acartia bifilosa* (Ac) and *Eurytemora affinis* (Eu) in relation to the respective seston FA across the  $\text{CO}_2$  treatments. (Linear regression, *E. affinis*:  $R^2= 0.18$ ,  $t= 2.818$ ,  $p= 0.008$ , PUFA;  $R^2= 0.10$ ,  $t= -2.37$ ,  $p= 0.02$ , MUFA;  $R^2= 0.16$ ,  $t= 2.91$ ,  $p= 0.005$ , SFA; *A. bifilosa*:  $p= 0.2$  PUFA;  $R^2= 0.18$ ,  $t= -2.97$ ,  $p= 0.005$ , MUFA;  $p= 0.5$ , SFA)
